# Supplementary material for: Cu2+ underpotential-deposition assisted synthesis of Au and Au–Pd alloy nanocrystals with systematic shape evolution
Source: Royal Society of Chemistry journal article supplement (doi:10.1039/c5ce00766f), 2015-01-01
Supplement: c5ce00766f1.pdf [file c5ce00766f1.pdf]

## Supporting Information

### **Cu<sup>2+</sup> Under-Potential-Deposition Assisted Synthesis of Au and Au-Pd Alloy Nanocrystals with Systematic Shape Evolution**

Lei Zhang, Qiaoli Chen, Zhiyuan Jiang, Zhaoxiong Xie\* and Lansun Zheng

*State Key Laboratory of Physical Chemistry of Solid Surfaces, Collaborative Innovation*

*Center of Chemistry for Energy Materials, and Department of Chemistry, College of*

*Chemistry and Chemical Engineering, Xiamen University, Xiamen 361005, China*

*E-mail: [zxie@xmu.edu.cn](mailto:zxie@xmu.edu.cn)*

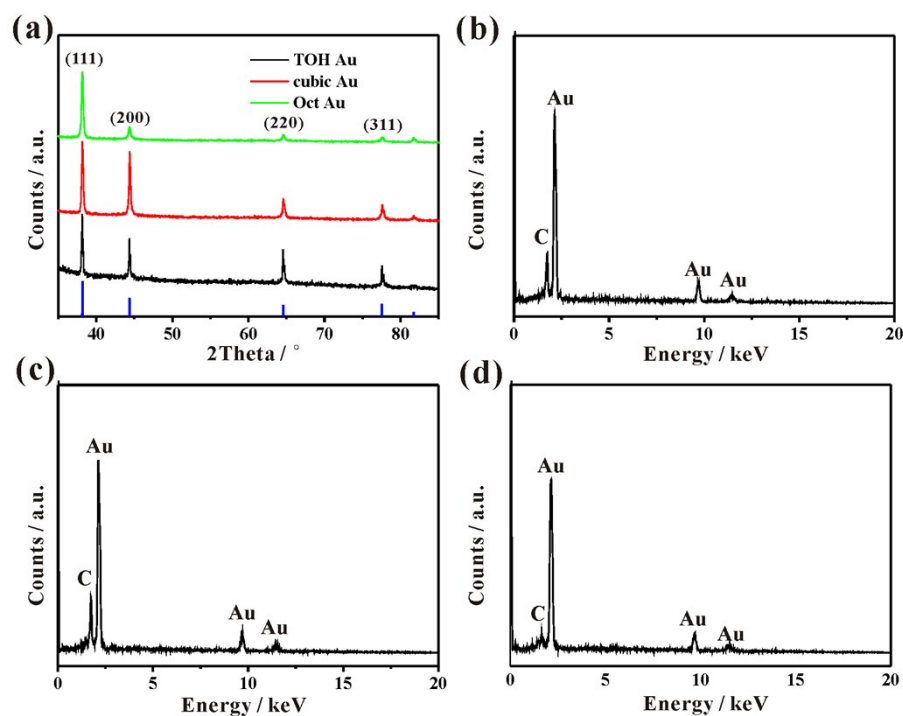

**Figure S1** (a) XRD patterns of the as-prepared three types Au NCs, (b-d) EDS of trisoctahedral Au NCs, cubic Au NCs and octahedral/triangular plate-like Au NCs, respectively.

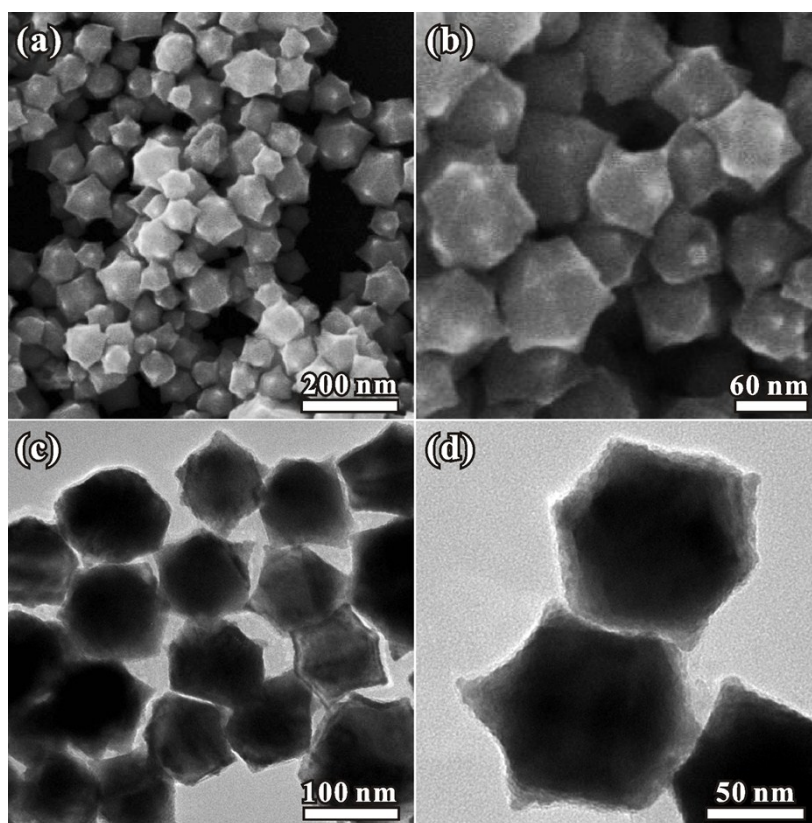

**Figure S2** SEM and TEM images of the product from the reaction with the same condition used in the synthesis of HOH Au-Pd alloy but in the absence of  $\text{Cu}(\text{CH}_3\text{COO})_2$ .

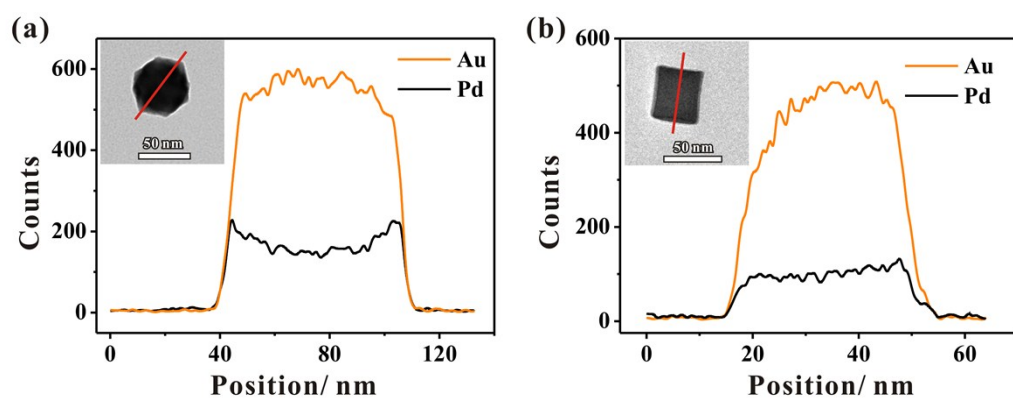

**Figure S3** The cross-sectional compositional line-scanning profile of the HOH and cubic Au-Pd alloy NCs, respectively.
